# Supplementary material for: Volatile Sedation for Acute Respiratory Distress Syndrome Patients on Venovenous Extracorporeal Membrane Oxygenation and Ultraprotective Ventilation
Source: PubMed Central journal article supplement — Crit Care Explor. 2021 Jan 8;3(1):e0310. doi: 10.1097/CCE.0000000000000310 (PMC7803679; doi:10.1097/cce.0000000000000310), 2021-01-08
Supplement: cc9-3-e0310-s001.pdf [file cc9-3-e0310-s001.pdf]

Supplemental Digital Content

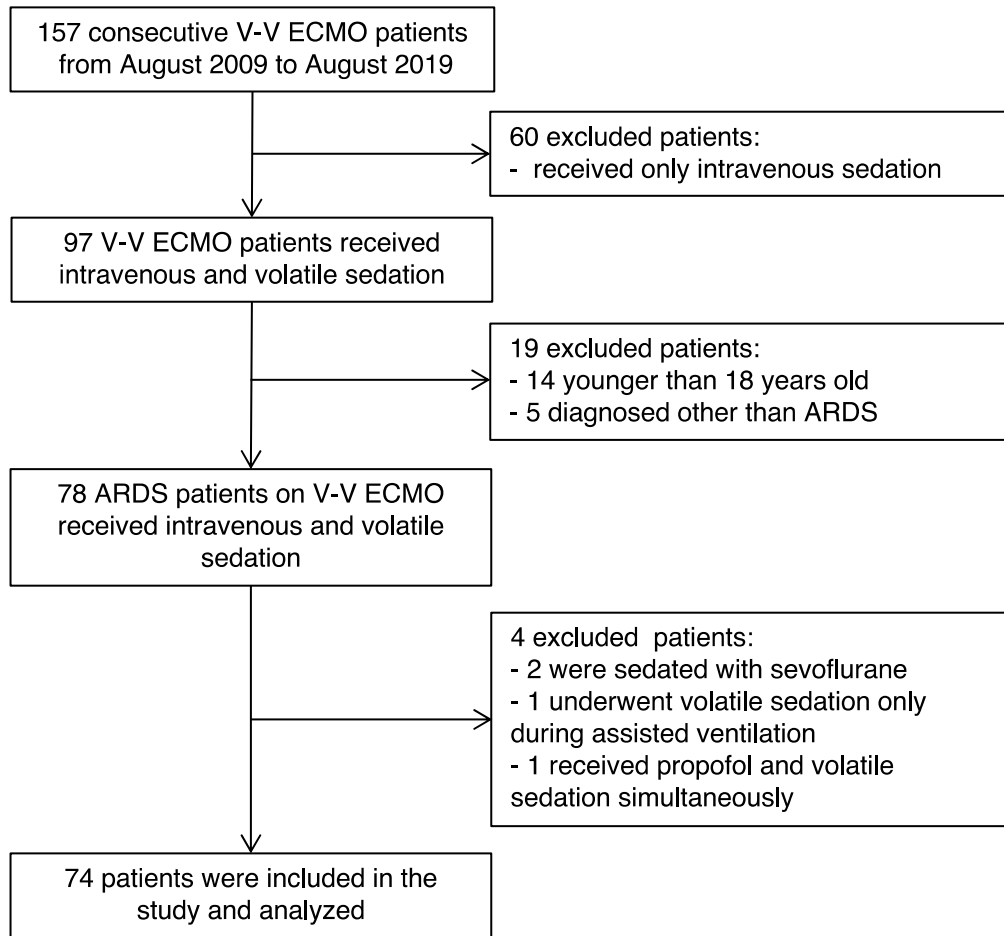

**Figure S1. Patient Flowchart.** V-V ECMO, veno-venous extracorporeal membrane oxygenation; ARDS, acute respiratory distress syndrome.

|                          | IV before<br>Isoflurane<br>(260 days) | Isoflurane<br>(506 days)     | IV after Isoflurane<br>(204 days) | p-value          |
|--------------------------|---------------------------------------|------------------------------|-----------------------------------|------------------|
| Tidal volume, mL         | 267 ± 104                             | 264 ± 79 <sup>§,&amp;</sup>  | 211 ± 94 <sup>§</sup>             | <b>&lt;0.001</b> |
| Respiratory rate, /min   | 10 ± 3                                | 10 ± 3                       | 11 ± 3                            | 0.114            |
| FiO <sub>2</sub> , %     | 70 ± 19                               | 64 ± 18 <sup>§</sup>         | 70 ± 21 <sup>§</sup>              | <b>&lt;0.001</b> |
| PEEP, cmH <sub>2</sub> O | 16 ± 4                                | 16 ± 3                       | 15 ± 4                            | 0.594            |
| Blood flow, L/min        | 3.7 ± 0.5                             | 3.7 ± 0.5                    | 3.7 ± 0.6                         | 0.101            |
| Gas flow, L/min          | 5.7 ± 2.3                             | 6.1 ± 2.1 <sup>§,&amp;</sup> | 6.3 ± 1.9                         | <b>&lt;0.001</b> |
| Pulmonary shunt, %       | 62 ± 15                               | 58 ± 16                      | 63 ± 19 <sup>§</sup>              | <b>0.001</b>     |

**Table S1. Ventilation/ECMO.** Data are expressed as mean ± standard deviation. FiO<sub>2</sub>, oxygen

inspiratory fraction; PaO<sub>2</sub>, arterial oxygen tension; PEEP, positive end-expiratory pressure. §

p<0.05 vs IV before gas; & p<0.05 vs IV after gas
